# Supplementary material for: Chromosome-Level Genome Assembly Provides Insights into the Evolution of the Special Morphology and Behaviour of Lepturacanthus savala
Source: MDPI journal article supplement (doi:10.3390/genes14061268), 2023-06-15
Supplement: s1 [file s1]

## Supplementary Materials

### Chromosome-level genome assembly provides insights into the evolution of the special morphology and behaviour of *Lepturacanthus savala*

Ren-Xie Wu\*, Ben-Ben Miao, Fang-Yuan Han, Su-Fang Niu, Zhen-Bang Liang, Qing-Hua Wang and Yan-Shan Liang

College of Fisheries, Guangdong Ocean University, Zhanjiang 524088, China;  
benben.miao@outlook.com (B.B.M.); hanfangyuan1999@163.com (F.Y.H.);  
wolf0487@126.com(S.F.N); liangzhenbang0403@163.com (Z.B.L.);  
wqh31016877430@163.com(Q.H.W.); yanshan-liang@outlook.com(Y.S.L.);  
\* Correspondence: wurenxie@163.com

**Table S1.** Summary statistics for contigs and scaffolds that at the sequence and chromosome levels.

| Level       | Type     | Total<br>length (bp) | Total<br>number | N50<br>length (bp) | N50<br>number | N90<br>length (bp) | N90<br>number |
|-------------|----------|----------------------|-----------------|--------------------|---------------|--------------------|---------------|
| Sequences   | Contig   | 790,022,946          | 215             | 19,013,249         | 16            | 3,654,334          | 48            |
|             | Scaffold | 790,022,946          | 215             | 19,013,249         | 16            | 3,654,334          | 48            |
| Chromosomes | Contig   | 790,022,946          | 219             | 19,013,249         | 16            | 3,585,864          | 50            |
|             | Scaffold | 790,034,746          | 101             | 32,774,443         | 11            | 23,501,047         | 22            |

**Table S2.** Types and counts of various Di-Tags identified during filtering

| Di-Tag Type                         | Di-Tags Number |
|-------------------------------------|----------------|
| Total Di-Tags                       | 6,124,460      |
| Valid Di-Tags                       | 5,365,963      |
| Same circularized Di-Tags           | 10,484         |
| Same fragment dangling ends Di-Tags | 16,106         |
| Same fragment internal Di-Tags      | 36,221         |
| Re-ligation Di-Tags                 | 147,118        |
| Contiguous Di-Tags                  | 97,223         |
| Wrong size Di-Tags                  | 451,345        |

**Table S3.** Overview of genome-wide repeat sequences

| Repeat<br>Type | RepeatMask<br>length (bp) | Percent | ProteinMask<br>length (bp) | Percent | Combined<br>length (bp) | Percent | TRF<br>length (bp) | Percent |
|----------------|---------------------------|---------|----------------------------|---------|-------------------------|---------|--------------------|---------|
| Tandem         |                           |         |                            |         |                         |         | 96,078,789         | 12.16%  |
| DNA TE         | 119,984,228               | 15.19%  | 10,687,843                 | 1.35%   | 123,793,417             | 15.67%  |                    |         |
| LINE TE        | 41,633,842                | 5.27%   | 14,062,603                 | 1.78%   | 47,584,557              | 6.02%   |                    |         |
| SINE TE        | 18,805,604                | 2.38%   | 0                          | 0%      | 18,805,604              | 2.38%   |                    |         |
| LTR TE         | 101,322,579               | 12.83%  | 7,690,710                  | 0.97%   | 102,555,646             | 12.98%  |                    |         |
| Unknown        | 9,710,987                 | 1.23%   | 0                          | 0%      | 9,710,987               | 1.23%   |                    |         |
| Total          | 271,664,381               | 34.39%  | 32,390,092                 | 4.10%   | 277,525,905             | 35.13%  |                    |         |

**Table S4.** Annotation and detailed summary statistics of non-coding RNA

| ncRNA Type |          | Copy   | Average length (bp) | Total length (bp) | Percent (%) |
|------------|----------|--------|---------------------|-------------------|-------------|
| miRNA      |          | 1,434  | 100.33              | 143,870           | 0.018211    |
| tRNA       |          | 9,086  | 75.49               | 685,943           | 0.086824    |
| rRNA       | rRNA     | 10,263 | 204.63              | 2,100,089         | 0.27        |
|            | 18S      | 534    | 843.33              | 450,338           | 0.057002    |
|            | 28S      | 1,571  | 508.42              | 798,729           | 0.1         |
|            | 5.8S     | 251    | 155.26              | 38,970            | 0.004933    |
|            | 5S       | 7,907  | 102.7               | 812,052           | 0.1         |
| snRNA      | snRNA    | 1,328  | 147.45              | 195,807           | 0.024785    |
|            | CD-box   | 131    | 112.66              | 14,758            | 0.001868    |
|            | HACA-box | 93     | 144.27              | 13,417            | 0.001698    |
|            | Splicing | 1,090  | 151.22              | 164,829           | 0.020864    |

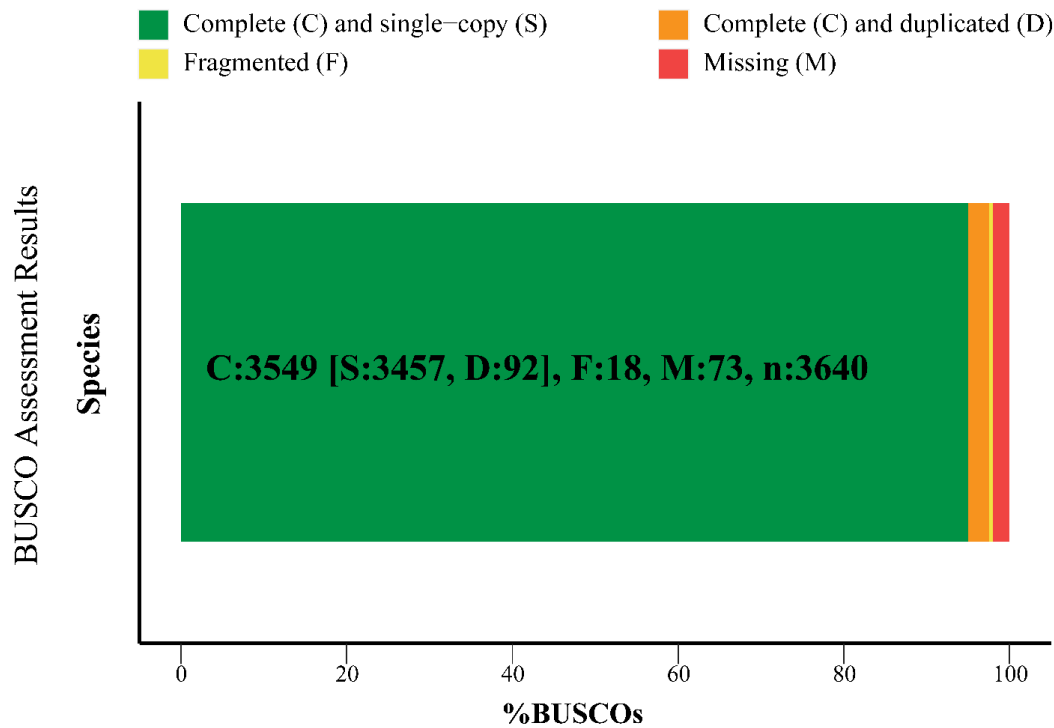**Figure S1.** BUSCO genome integrity assessment and GC content distribution.

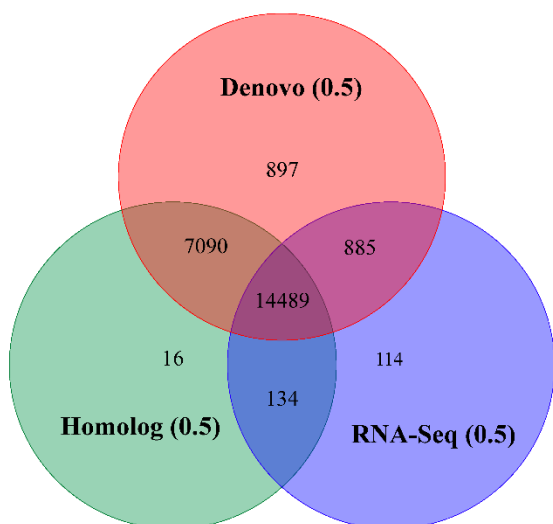

Evidence Support

(A)

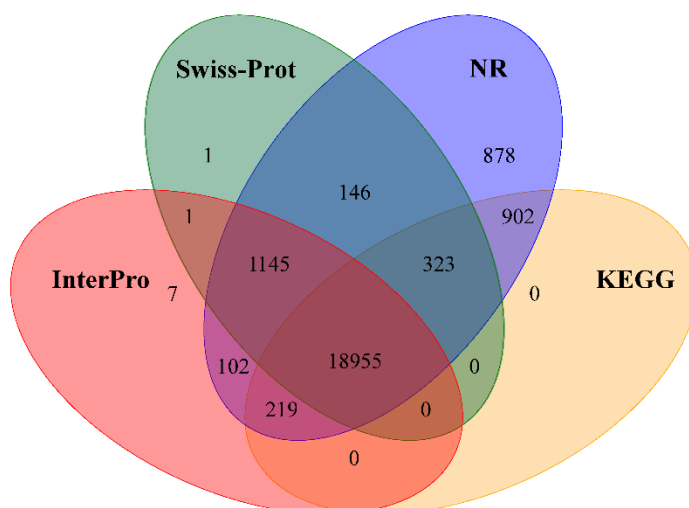

Functions Annotation

(B)

**Figure S2.** Genes identified by genome-wide de novo prediction, homologous prediction, and RNA sequencing data-based genes prediction (A). Functional annotation of genes based on NR, SwissProt, KEGG, InterPro databases (B).

### A Group 1 | GO Enrichment

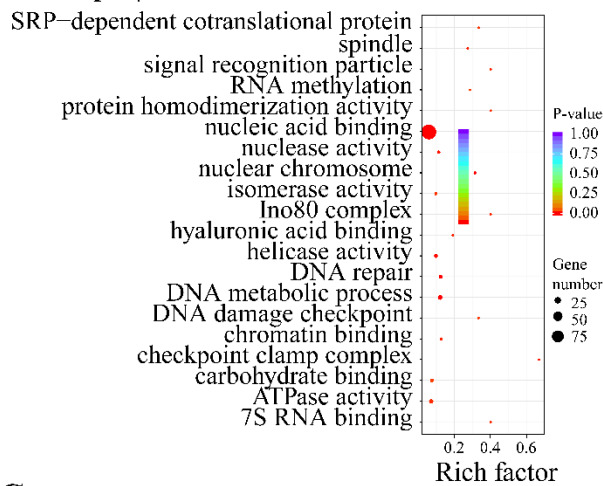

### B Group 1 | KEGG Enrichment

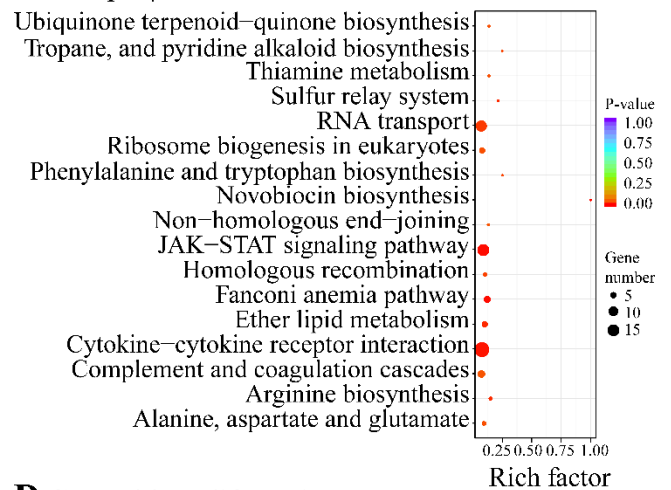

### C Group 2 | GO Enrichment

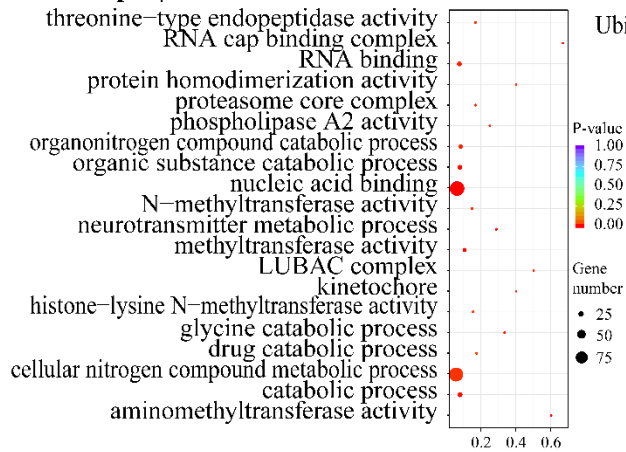

### D Group 2 | KEGG Enrichment

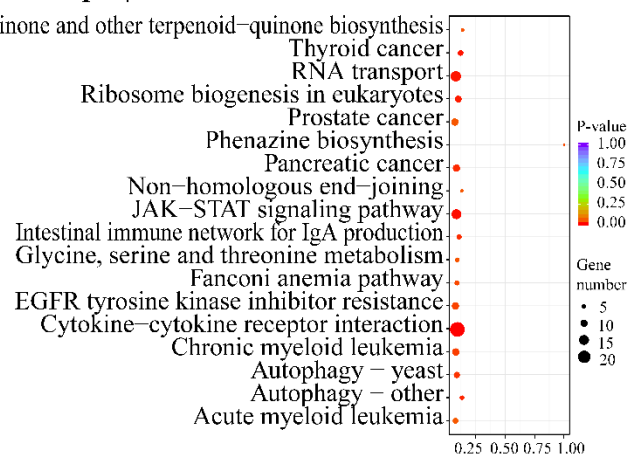

**Figure S3.** GO terms and KEGG pathways for genes screened in two groups of positive selection analyses.
